# Supplementary material for: Reference MicroRNAs for RT-qPCR Assays in Cervical Cancer Patients and Their Application to Studies of HPV16 and Hypoxia Biomarkers
Source: PubMed Central journal article supplement — Transl Oncol. 2019 Jan 17;12(3):576–84. doi: 10.1016/j.tranon.2018.12.010 (PMC6349320; doi:10.1016/j.tranon.2018.12.010), 2019-01-17
Supplement: mmc1.pdf [file mmc1.pdf]

**Supplemental Table 1. Patient and tumor characteristics.**

| Characteristic                                | miRNA sequencing cohort, n=90 |     | RT-qPCR cohort 1, n=29* |     | RT-qPCR cohort 1 extended, n=45 <sup>†</sup> |     | RT-qPCR cohort 2, n=20 <sup>‡</sup> |     |
|-----------------------------------------------|-------------------------------|-----|-------------------------|-----|----------------------------------------------|-----|-------------------------------------|-----|
|                                               | No                            | %   | No                      | %   | No                                           | %   | No                                  | %   |
| <b>Age (years)</b>                            |                               |     |                         |     |                                              |     |                                     |     |
| Median                                        | 52.9                          |     | 58.2                    |     | 58.1                                         |     | 56                                  |     |
| Range                                         | 22-84                         |     | 22-78                   |     | 22-81                                        |     | 30-81                               |     |
| <b>Tumour histology</b>                       |                               |     |                         |     |                                              |     |                                     |     |
| Squamous                                      | 90                            | 100 | 29                      | 100 | 45                                           | 100 | 20                                  | 100 |
| <b>Tumor stage (FIGO)</b>                     |                               |     |                         |     |                                              |     |                                     |     |
| 1b -2b                                        | 70                            | 78  | 19                      | 65  | 33                                           | 73  | 13                                  | 65  |
| 3b-4a                                         | 20                            | 22  | 10                      | 35  | 12                                           | 27  | 7                                   | 35  |
| <b>Tumor volume (cm<sup>3</sup>) §</b>        |                               |     |                         |     |                                              |     |                                     |     |
| Median                                        | 26                            |     | 41                      |     | 31                                           |     | 60                                  |     |
| Range                                         | 3-267                         |     | 3-218                   |     | 3-218                                        |     | 3-321                               |     |
| <b>Lymph node status<sup>  </sup></b>         |                               |     |                         |     |                                              |     |                                     |     |
| Positive                                      | 44                            | 49  | 15                      | 51  | 19                                           | 42  | 11                                  | 55  |
| Negative                                      | 46                            | 51  | 14                      | 49  | 26                                           | 58  | 9                                   | 45  |
| <b>HPV type<sup>¶</sup></b>                   |                               |     |                         |     |                                              |     |                                     |     |
| HPV16                                         | 50                            | 56  | 10                      | 34  | 23                                           | 51  | 13                                  | 60  |
| HPV18                                         | 14                            | 16  | 11                      | 38  | 14                                           | 31  | 2                                   | 10  |
| HPV other                                     | 16                            | 18  | 6                       | 21  | 6                                            | 13  | 2                                   |     |
| HPV negative                                  | 8                             | 9   | 2                       | 7   | 2                                            | 4   | 0                                   |     |
| HPV16+HPV18                                   | 1                             | 1   |                         |     |                                              |     | 3                                   | 15  |
| <b>Hypoxia status<sup>**</sup></b>            |                               |     |                         |     |                                              |     |                                     |     |
| More hypoxic                                  | 26                            | 29  | 10                      | 34  | 18                                           | 40  | 10                                  | 50  |
| Less hypoxic                                  | 64                            | 71  | 19                      | 66  | 27                                           | 60  | 10                                  | 50  |
| <b>Observation time (months)<sup>††</sup></b> |                               |     |                         |     |                                              |     |                                     |     |
| Median                                        | 39                            |     | 27.3                    |     | 36                                           |     | 36                                  |     |
| Range                                         | 5-60                          |     | 4.6-60                  |     | 4.6-60                                       |     | 2-60                                |     |
| <b>Recurrence<sup>‡‡</sup></b>                | 19                            | 21  | 10                      | 34  | 11                                           | 24  | 10                                  | 50  |
| <b>Disease specific death<sup>‡‡</sup></b>    | 16                            | 18  | 9                       | 31  | 10                                           | 22  | 9                                   | 45  |

FIGO, Federation International de Gynecologie et d'Obstetrique.

\* Subgroup of patients in sequencing cohort.

<sup>†</sup> Subgroup of patients in sequencing cohort, includes patients in RT-qPCR cohort 1.

<sup>‡</sup> Patients not in sequencing cohort.

<sup>§</sup> Determined from MR-images before treatment. Calculated based on 3 orthogonal diameters (a,b,c) as  $(\pi/6)abc$ . Undetermined for 6 tumors in sequencing cohort, two in RT-qPCR cohort 1, four in RT-qPCR cohort 1 extended, and one in RT-qPCR cohort 2.

<sup>||</sup> Detected by MRI or CT at diagnosis, according to the response evaluation criteria in solid tumors version 1.1.

<sup>¶</sup> Collected from (Lando, M. *et al*, 2013).

<sup>\*\*</sup> Output from 6-gene hypoxia classifier collected from (Fjeldbo, C.S. *et al*, 2016b).

<sup>††</sup> Based on patients without recurrence.

<sup>‡‡</sup> Follow-up data up to 60 months.

**Supplemental Table 2. Exiqon microRNA LNA™ PCR primer sets**

| Candidate reference RNA       | Product no. |
|-------------------------------|-------------|
| miR-151a-5p                   | 204007      |
| miR-152-3p                    | 204294      |
| miR-505-3p                    | 204214      |
| miR-532-5p                    | 204221      |
| miR-652-3p                    | 204387      |
| miR-671-3p                    | 204024      |
| miR-28-5p                     | 204322      |
| miR-423-5p                    | 204488      |
| RNU6                          | 203907      |
| <b>MiRNA of investigation</b> |             |
| miR-210-3p                    | 204333      |
| miR-9-5p                      | 204513      |

**Supplemental Table 4. Ranking of 20 candidate reference miRNAs in RefFinder**

| MiRNA       | Overall ranking |           | Comparative $\Delta Ct$ |           | BestKeeper |           | NormFinder |           | GeNorm |           |
|-------------|-----------------|-----------|-------------------------|-----------|------------|-----------|------------|-----------|--------|-----------|
|             | Rank            | Stability | Rank                    | Stability | Rank       | Stability | Rank       | Stability | Rank   | Stability |
| miR-28-5p   | 1               | 1.78      | 1                       | 0.79      | 2          | 1.27      | 1          | 0.39      | 5      | 0.48      |
| miR-423-3p  | 2               | 2.45      | 3                       | 0.80      | 1          | 1.24      | 3          | 0.44      | 4      | 0.42      |
| miR-505-3p  | 3               | 3.46      | 2                       | 0.79      | 7          | 1.31      | 2          | 0.40      | 6      | 0.52      |
| miR-151a-5p | 4               | 3.98      | 4                       | 0.82      | 5          | 1.31      | 9          | 0.50      | 1      | 0.00      |
| miR-151b    | 5               | 4.47      | 5                       | 0.82      | 6          | 1.31      | 10         | 0.50      |        |           |
| miR-532-5p  | 6               | 4.74      | 6                       | 0.82      | 3          | 1.28      | 4          | 0.48      | 7      | 0.56      |
| miR-671-3p  | 7               | 5.21      | 7                       | 0.82      | 8          | 1.31      | 7          | 0.49      | 3      | 0.34      |
| miR-152-3p  | 8               | 6.16      | 8                       | 0.84      | 4          | 1.30      | 5          | 0.48      | 9      | 0.61      |
| miR-652-3p  | 9               | 8.49      | 9                       | 0.84      | 9          | 1.32      | 8          | 0.50      | 8      | 0.58      |
| miR-140-5p  | 10              | 8.80      | 10                      | 0.84      | 10         | 1.34      | 6          | 0.49      | 10     | 0.63      |
| miR-664a-3p | 11              | 11.00     | 11                      | 0.91      | 11         | 1.37      | 11         | 0.62      | 11     | 0.65      |
| miR-96-5p   | 12              | 12.47     | 12                      | 0.94      | 14         | 1.45      | 12         | 0.66      | 12     | 0.67      |
| miR-425-3p  | 13              | 13.00     | 13                      | 0.94      | 13         | 1.44      | 13         | 0.66      | 13     | 0.69      |
| miR-181c-3p | 14              | 13.47     | 14                      | 0.97      | 12         | 1.39      | 14         | 0.69      | 14     | 0.72      |
| miR-126-3p  | 15              | 15.00     | 15                      | 0.99      | 15         | 1.46      | 15         | 0.72      | 15     | 0.75      |
| miR-598-3p  | 16              | 16.00     | 16                      | 1.03      | 16         | 1.54      | 16         | 0.79      | 16     | 0.77      |
| miR-708-3p  | 17              | 17.73     | 17                      | 1.06      | 19         | 1.66      | 17         | 0.83      | 18     | 0.83      |
| miR-708-5p  | 18              | 18.24     | 18                      | 1.08      | 18         | 1.65      | 18         | 0.86      | 19     | 0.85      |
| miR-301b-3p | 19              | 18.72     | 19                      | 1.09      | 20         | 1.70      | 19         | 0.87      | 17     | 0.80      |
| miR-214-5p  | 20              | 19.20     | 20                      | 1.10      | 17         | 1.60      | 20         | 0.88      | 20     | 0.87      |

**Supplemental Table 5. MiRNA family affiliation of candidate reference miRNAs.**

| MiRNA       | Family ID | Family Accession | Chromosome |
|-------------|-----------|------------------|------------|
| miR-28-5p   |           |                  | chr3       |
| miR-151a-5p | mir-28    | MIPF0000057      | chr8       |
| miR-151b    |           |                  | chr14      |
| miR-152-3p  | mir-148   | MIPF0000056      | chr17      |
| miR-423-3p  | mir-423   | MIPF0000329      | chr17      |
| miR-505-3p  | mir-505   | MIPF0000217      | chrX       |
| miR-532-5p  | mir-188   | MIPF0000113      | chrX       |
| miR-652-3p  | mir-652   | MIPF0000333      | chrX       |
| miR-671-3p  | mir-671   | MIPF0000358      | chr7       |

**Supplemental Table 6. PCR efficiency.**

| Candidate reference RNA | PCR efficiency | Comment                                         |
|-------------------------|----------------|-------------------------------------------------|
| miR-151a-5p             | 99%            |                                                 |
| miR-152-3p              | 101%           |                                                 |
| miR-505-3p              | 99%            |                                                 |
| miR-532-5p              | 70 %           | Low efficiency *                                |
| miR-652-3p              | 93%            |                                                 |
| miR-671-3p              | NA             | High Cq values (>33 at 80x) *                   |
| miR-28-5p               | 111%           | Suboptimal efficiency compared to miR-151a-5p * |
| miR-423-5p              | 102 %          |                                                 |
| RNU6                    | 108%           |                                                 |
| MiRNA of investigation  |                |                                                 |
| miR-210-3p              | 95%            |                                                 |
| miR-9-5p                | 101%           |                                                 |

\* indicate exclusion from further analysis

**Supplemental Table 7. RT-qPCR Cq values for candidate reference RNAs**

| Reference RNA | Cq Range | Cq Max | Cq Min | Mean  | Std Dev |
|---------------|----------|--------|--------|-------|---------|
| miR-151a-5p   | 2.13     | 29.14  | 27.00  | 28.09 | 0.52    |
| miR-152-3p    | 2.10     | 29.86  | 27.76  | 28.81 | 0.51    |
| miR-505-3p    | 3.65     | 33.28  | 29.63  | 31.93 | 0.70    |
| miR-652-3p    | 2.32     | 31.14  | 28.81  | 29.86 | 0.53    |
| miR-423-3p    | 2.10     | 30.01  | 27.91  | 28.73 | 0.56    |
| RNU6          | 6.32     | 27.50  | 21.19  | 23.50 | 1.60    |

# Supplemental figure 1

A)

|             |                            |
|-------------|----------------------------|
| miR-151a-5p | UCGAGGAGCUCACAGUCUAGU..... |
| miR-151b    | UCGAGGAGCUCACAGUCU.....    |
| miR-28-5p   | ..AAGGAGCUCACAGUCUAUUGAG.. |

B)

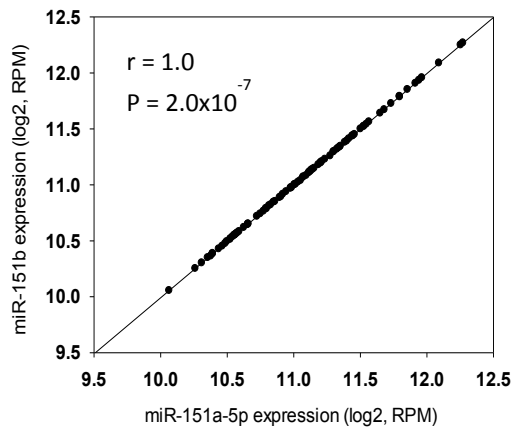

C)

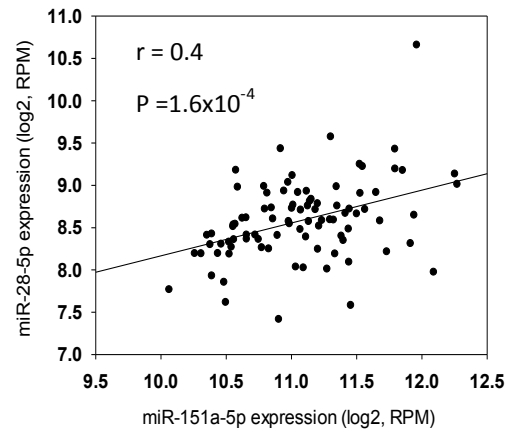

Supplemental Fig. 1. **MiR-28 family members of candidate reference miRNAs.** A) Sequence alignment of miR-151a-5p, miR-151b and miR-28-5p. Regression plots of miR-151a-5p vs miR-151b (B) and miR-28-5p (C) expression levels (log2, RPM) and corresponding correlation coefficient (r) and p-value from Pearson's correlation analysis.

## Supplemental figure 2

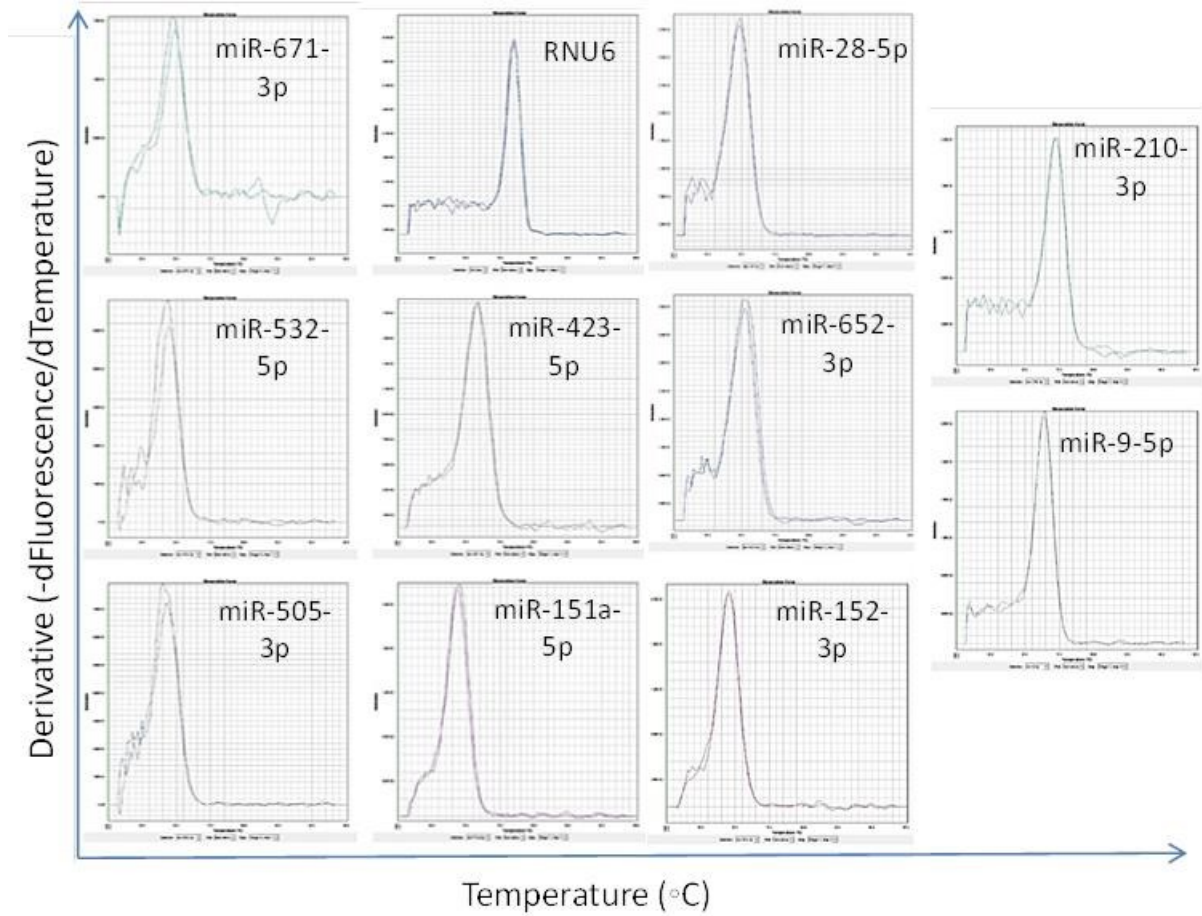

Supplemental Fig. 2. **Specificity of the PCR products.** Melting curve analysis generated for the amplified product of candidate reference RNAs and miRNAs of investigation. Change in fluorescence is plotted versus temperature.

### Supplemental figure 3

A)

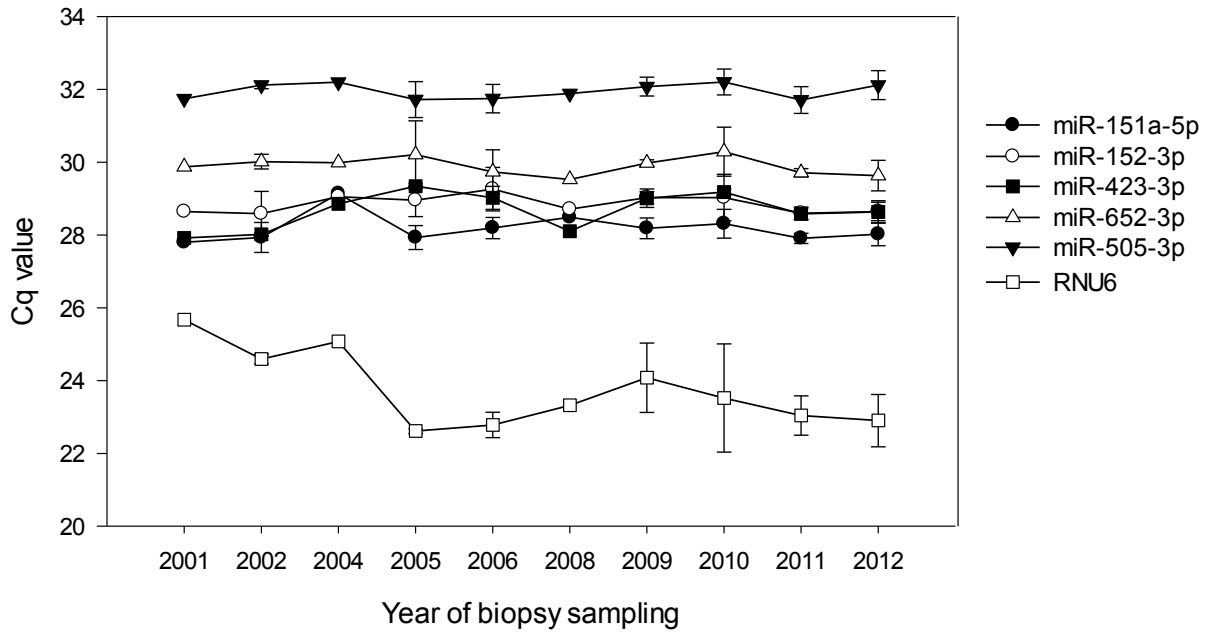

B)

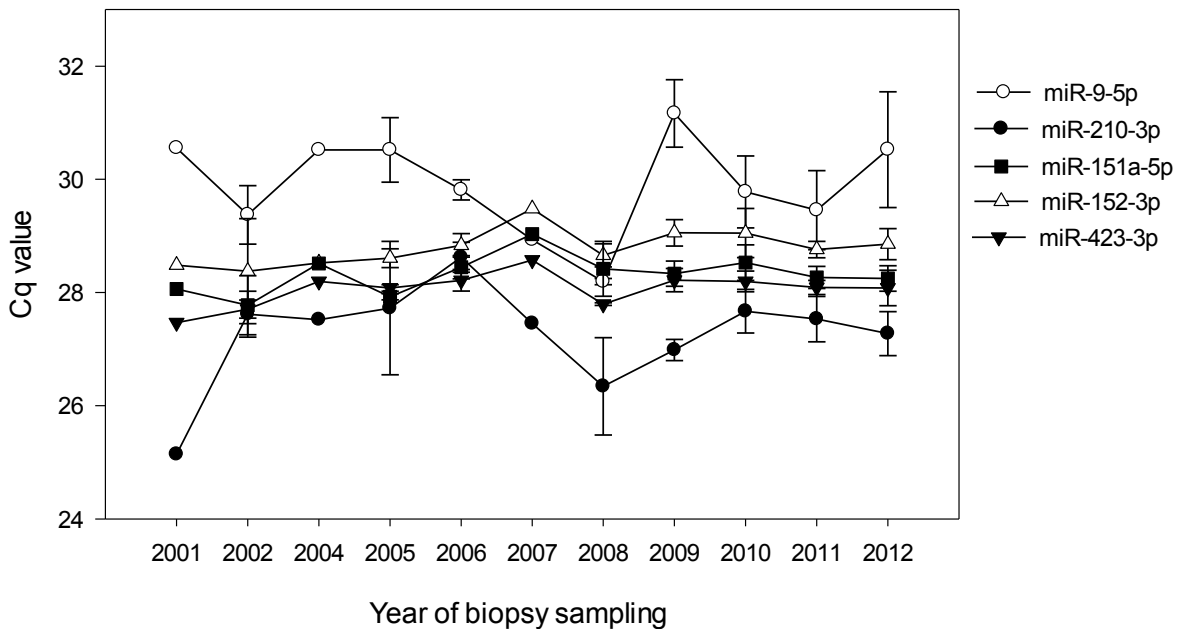

Supplemental Fig. 3. **Cq values versus year of biopsy sampling.** Raw Cq values from RT-qPCR analyses of A) candidate reference miRNAs and RNU6 versus year of biopsy sampling in RT-qPCR cohort 1 (29 samples) and B) the selected reference miRNAs and miRNAs of investigation versus year of biopsy sampling in RT-qPCR cohort 1 extended. Points and error bars indicate mean Cq value and standard deviation. Spearman rank order correlation analysis showed no significance between the miRNAs or RNU6 and the year of biopsy sampling.

## Supplemental figure 4

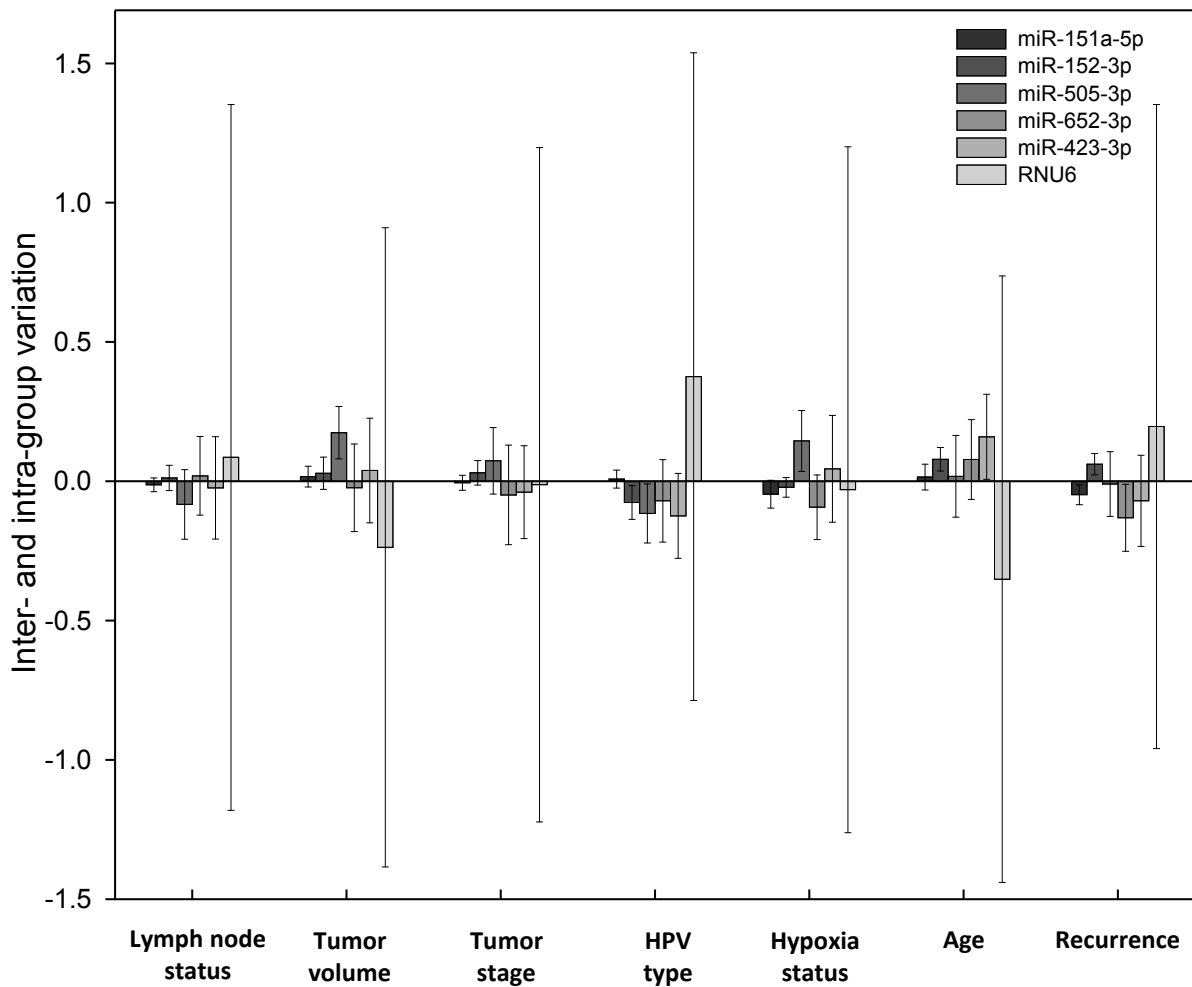

Supplemental Fig. 4. **Inter- and Intra-group variation calculated by NormFinder.** The columns represent the inter-group variation and the error bars the average of the intra-group variances. The top-ranked gene has an inter-group variation as close to zero as possible and as small error bars as possible.
